# Supplementary material for: Low immunogenicity predicted for emerging avian-origin H7N9: Implication for influenza vaccine design
Source: PubMed Central journal article supplement — Hum Vaccin Immunother. 2013 May 1;9(5):950–6. doi: 10.4161/hv.24939 (PMC3899161; doi:10.4161/hv.24939), 2013-05-01
Supplement: hvi-9-950-s01.pdf [file hvi-9-950-s01.pdf]

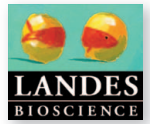

## **Supplemental Material to:**

**Anne S. De Groot, Matthew Ardito, Frances Terry, Lauren Levitz, Ted Ross, Lenny Moise and William Martin**

**Low immunogenicity predicted for emerging avian-origin H7N9: Implication for influenza vaccine design**

**2013; 9(5)**

**<http://dx.doi.org/10.4161/hv.24939>**

**[www.landesbioscience.com/journals/vaccines/article/24939](http://www.landesbioscience.com/journals/vaccines/article/24939)**

**Supplemental Files:**

**2013HV0180R-S1.xlsx**

**2013HV0180R-S2.xlsx**
